# Supplementary material for: Structure–reactivity correlations in nucleophilic substitution reactions of Y-substituted phenyl X-substituted benzoates with anionic and neutral nucleophiles
Source: Royal Society of Chemistry journal article supplement (doi:10.1039/b607194e), 2006-01-01
Supplement: b607194e.pdf [file b607194e.pdf]

## Supplementary Data

### Structure-Reactivity Correlations in Nucleophilic Substitution Reactions of Y-substituted Phenyl X-substituted Benzoates with Anionic and Neutral Nucleophiles

Ik-Hwan Um,<sup>\*</sup> Ji-Youn Lee, Mizue Fujio,<sup>†</sup> and Yuho Tsuno<sup>†</sup>

Department of Chemistry, Ewha Womans University, Seoul 120-750, Korea

<sup>†</sup>Institute for Materials Chemistry and Engineering, Kyushu University, Hakozaki, Higashi-ku, Fukuoka 812-8581, Japan

Tel : 82-2-3277-2349; Fax : 82-2-3277-2844; e-mail : ihum@ewha.ac.kr

#### Table of Contents

- (1) Tables S1 – S2. Summary of kinetic data for the reaction of 4-nitrophenyl X-substituted benzoates with OH<sup>-</sup> in 80 mol % H<sub>2</sub>O / 20 mol % DMSO at 25.0 ± 0.1°C.----- (S3 – S4)
- (2) Tables S3 – S14. Summary of kinetic data for the reaction of 4-nitrophenyl X-substituted benzoates with CN<sup>-</sup> in 80 mol % H<sub>2</sub>O / 20 mol % DMSO at 25.0 ± 0.1°C.-----  
----- (S4 – S9)
- (3) Tables S15 – S18. Summary of kinetic data for the reaction of 4-nitrophenyl X-substituted benzoates with piperidine in 80 mol % H<sub>2</sub>O / 20 mol % DMSO at 25.0 ± 0.1°C.-  
----- (S10 – S11)
- (4) Tables S19 – S27. Summary of kinetic data for the reaction of Y-substituted phenyl benzoates with CN<sup>-</sup> in 80 mol % H<sub>2</sub>O / 20 mol % DMSO at 25.0 ± 0.1°C.----- (S12 – S16)

(5) Tables S28. Summary of kinetic data for the reaction of Y-substituted phenyl benzoates with hydrazine in 80 mol % H<sub>2</sub>O / 20 mol % DMSO at 25.0 ± 0.1°C.-----(S16)

(6) Tables S29. Summary of kinetic data for the reaction of Y-substituted phenyl benzoates with glycylglycine in 80 mol % H<sub>2</sub>O / 20 mol % DMSO at 25.0 ± 0.1°C.-----(S17)

Table S1. Summary of kinetic data for the reaction of 4-nitrophenyl 4-dimethylaminobenzoate(**1k**) with OH<sup>-</sup> in 80 mol % H<sub>2</sub>O / 20 mol % DMSO at 25.0 ± 0.1°C.

| [OH <sup>-</sup> ] / 10 <sup>-3</sup> M | <i>k</i> <sub>obsd</sub> / 10 <sup>-3</sup> s <sup>-1</sup> |
|-----------------------------------------|-------------------------------------------------------------|
| 17.8                                    | 2.46                                                        |
| 32.7                                    | 4.45                                                        |
| 45.2                                    | 6.39                                                        |
| 56.0                                    | 7.94                                                        |
| 65.3                                    | 9.21                                                        |

$$k_N = 0.144 \pm 0.002 \text{ M}^{-1}\text{s}^{-1}$$

$$\text{intercept} = -0.0003 \text{ s}^{-1} \quad \text{corr. coeff.} = 0.9996$$

Table S2. Summary of kinetic data for the reaction of 4-nitrophenyl 4-hydroxybenzoate(**1l**) with OH<sup>-</sup> in 80 mol % H<sub>2</sub>O / 20 mol % DMSO at 25.0 ± 0.1°C.

| [OH <sup>-</sup> ] / 10 <sup>-3</sup> M | <i>k</i> <sub>obsd</sub> / 10 <sup>-4</sup> s <sup>-1</sup> |
|-----------------------------------------|-------------------------------------------------------------|
| 17.8                                    | 1.60                                                        |
| 32.7                                    | 3.11                                                        |
| 45.2                                    | 4.43                                                        |
| 56.0                                    | 5.45                                                        |
| 65.3                                    | 6.40                                                        |

$$k_N = 0.0101 \pm 0.0001 \text{ M}^{-1}\text{s}^{-1}$$

intercept =  $-0.00001 \text{ s}^{-1}$       corr. coeff. = 0.9997

Table S3. Summary of kinetic data for the reaction of 4-nitrophenyl 3,5-dinitrobenzoate(**1a**)

with  $\text{CN}^-$  in 80 mol %  $\text{H}_2\text{O}$  / 20 mol % DMSO at  $25.0 \pm 0.1^\circ\text{C}$ .

| $[\text{CN}^-] / 10^{-3}\text{M}$ | $k_{\text{obsd}} / 10^{-1}\text{s}^{-1}$ |
|-----------------------------------|------------------------------------------|
| 0.748                             | 0.314                                    |
| 1.49                              | 0.640                                    |
| 2.23                              | 0.975                                    |
| 2.96                              | 1.26                                     |
| 3.68                              | 1.56                                     |

$$k_{\text{N}} = 42.5 \pm 0.6 \text{ M}^{-1}\text{s}^{-1}$$

intercept =  $0.0006 \text{ s}^{-1}$       corr. coeff. = 0.9999

Table S4. Summary of kinetic data for the reaction of 4-nitrophenyl 4-chloro-3-

bromobenzoate(**1b**) with  $\text{CN}^-$  in 80 mol %  $\text{H}_2\text{O}$  / 20 mol % DMSO at  $25.0 \pm 0.1^\circ\text{C}$ .

| $[\text{CN}^-] / 10^{-3}\text{M}$ | $k_{\text{obsd}} / 10^{-2}\text{s}^{-1}$ |
|-----------------------------------|------------------------------------------|
| 1.61                              | 1.33                                     |
| 3.19                              | 2.69                                     |
| 4.75                              | 4.03                                     |
| 6.28                              | 5.08                                     |
| 7.79                              | 6.45                                     |

$$k_{\text{N}} = 8.17 \pm 0.17 \text{ M}^{-1}\text{s}^{-1}$$

intercept =  $0.0006 \text{ s}^{-1}$       corr. coeff. = 0.9993

Table S5. Summary of kinetic data for the reaction of 4-nitrophenyl 4-nitrobenzoate(**1c**)

with  $\text{CN}^-$  in 80 mol %  $\text{H}_2\text{O}$  / 20 mol % DMSO at  $25.0 \pm 0.1^\circ\text{C}$ .

| $[\text{CN}^-] / 10^{-3}\text{M}$ | $k_{\text{obsd}} / 10^{-2}\text{s}^{-1}$ |
|-----------------------------------|------------------------------------------|
| 3.97                              | 2.55                                     |
| 7.79                              | 4.69                                     |
| 11.5                              | 7.29                                     |
| 15.0                              | 9.27                                     |
| 18.4                              | 11.5                                     |

$$k_{\text{N}} = 6.25 \pm 0.12 \text{ M}^{-1}\text{s}^{-1}$$

intercept =  $-0.0002 \text{ s}^{-1}$       corr. coeff. = 0.9993

Table S6. Summary of kinetic data for the reaction of 4-nitrophenyl 4-cyanobenzoate(**1d**)

with  $\text{CN}^-$  in 80 mol %  $\text{H}_2\text{O}$  / 20 mol % DMSO at  $25.0 \pm 0.1^\circ\text{C}$ .

| $[\text{CN}^-] / 10^{-3}\text{M}$ | $k_{\text{obsd}} / 10^{-2}\text{s}^{-1}$ |
|-----------------------------------|------------------------------------------|
| 6.03                              | 3.10                                     |
| 7.80                              | 3.85                                     |
| 15.0                              | 6.80                                     |
| 21.7                              | 10.2                                     |
| 27.9                              | 12.8                                     |

$$k_{\text{N}} = 4.47 \pm 0.08 \text{ M}^{-1}\text{s}^{-1}$$

$$\text{intercept} = 0.003 \text{ s}^{-1}$$

$$\text{corr. coeff.} = 0.9993$$

Table S7. Summary of kinetic data for the reaction of 4-nitrophenyl 3-chlorobenzoate(**1e**)

with  $\text{CN}^-$  in 80 mol %  $\text{H}_2\text{O}$  / 20 mol % DMSO at  $25.0 \pm 0.1^\circ\text{C}$ .

| $[\text{CN}^-] / 10^{-3}\text{M}$ | $k_{\text{obsd}} / 10^{-2}\text{s}^{-1}$ |
|-----------------------------------|------------------------------------------|
| 7.80                              | 1.03                                     |
| 9.65                              | 1.29                                     |
| 18.4                              | 2.44                                     |
| 26.4                              | 3.48                                     |
| 33.8                              | 4.52                                     |

$$k_{\text{N}} = 1.33 \pm 0.01 \text{ M}^{-1}\text{s}^{-1}$$

$$\text{intercept} = -0.00007 \text{ s}^{-1}$$

$$\text{corr. coeff.} = 0.9999$$

Table S8. Summary of kinetic data for the reaction of 4-nitrophenyl 4-chlorobenzoate(**1f**)

with  $\text{CN}^-$  in 80 mol %  $\text{H}_2\text{O}$  / 20 mol % DMSO at  $25.0 \pm 0.1^\circ\text{C}$ .

| $[\text{CN}^-] / 10^{-3}\text{M}$ | $k_{\text{obsd}} / 10^{-2}\text{s}^{-1}$ |
|-----------------------------------|------------------------------------------|
| 9.65                              | 0.611                                    |
| 18.4                              | 1.18                                     |
| 26.4                              | 1.71                                     |
| 33.8                              | 2.15                                     |
| 37.2                              | 2.34                                     |

$$k_{\text{N}} = 0.628 \pm 0.001 \text{ M}^{-1}\text{s}^{-1}$$

intercept =  $0.0002 \text{ s}^{-1}$       corr. coeff. = 0.9996

Table S9. Summary of kinetic data for the reaction of 4-nitrophenyl benzoate(**1g**) with  $\text{CN}^-$  in 80 mol %  $\text{H}_2\text{O}$  / 20 mol % DMSO at  $25.0 \pm 0.1^\circ\text{C}$ .

| $[\text{CN}^-] / 10^{-3}\text{M}$ | $k_{\text{obsd}} / 10^{-3}\text{s}^{-1}$ |
|-----------------------------------|------------------------------------------|
| 18.2                              | 4.99                                     |
| 26.1                              | 6.96                                     |
| 33.3                              | 8.48                                     |
| 40.0                              | 9.99                                     |
| 46.1                              | 11.4                                     |

$k_{\text{N}} = 0.228 \pm 0.003 \text{ M}^{-1}\text{s}^{-1}$

intercept =  $0.0009 \text{ s}^{-1}$       corr. coeff. = 0.9996

Table S10. Summary of kinetic data for the reaction of 4-nitrophenyl 3-methylbenzoate(**1h**) with  $\text{CN}^-$  in 80 mol %  $\text{H}_2\text{O}$  / 20 mol % DMSO at  $25.0 \pm 0.1^\circ\text{C}$ .

| $[\text{CN}^-] / 10^{-3}\text{M}$ | $k_{\text{obsd}} / 10^{-2}\text{s}^{-1}$ |
|-----------------------------------|------------------------------------------|
| 57.6                              | 1.23                                     |
| 71.3                              | 1.47                                     |
| 83.2                              | 1.74                                     |
| 99.8                              | 2.02                                     |
| 116                               | 2.33                                     |

$k_{\text{N}} = 0.189 \pm 0.004 \text{ M}^{-1}\text{s}^{-1}$

$$\text{intercept} = 0.001 \text{ s}^{-1}$$

$$\text{corr. coeff.} = 0.9997$$

Table S11. Summary of kinetic data for the reaction of 4-nitrophenyl 4-methylbenzoate(**1i**)

with  $\text{CN}^-$  in 80 mol %  $\text{H}_2\text{O}$  / 20 mol % DMSO at  $25.0 \pm 0.1^\circ\text{C}$ .

| $[\text{CN}^-] / 10^{-3}\text{M}$ | $k_{\text{obsd}} / 10^{-3}\text{s}^{-1}$ |
|-----------------------------------|------------------------------------------|
| 32.6                              | 3.68                                     |
| 49.9                              | 5.85                                     |
| 64.7                              | 7.64                                     |
| 77.5                              | 8.89                                     |
| 83.2                              | 9.70                                     |

$$k_{\text{N}} = 0.117 \pm 0.003 \text{ M}^{-1}\text{s}^{-1}$$

$$\text{intercept} = -0.00007 \text{ s}^{-1}$$

$$\text{corr. coeff.} = 0.9991$$

Table S12. Summary of kinetic data for the reaction of 4-nitrophenyl 4-

methoxybenzoate(**1j**) with  $\text{CN}^-$  in 80 mol %  $\text{H}_2\text{O}$  / 20 mol % DMSO at  $25.0 \pm 0.1^\circ\text{C}$ .

| $[\text{CN}^-] / 10^{-3}\text{M}$ | $k_{\text{obsd}} / 10^{-3}\text{s}^{-1}$ |
|-----------------------------------|------------------------------------------|
| 71.3                              | 3.84                                     |
| 83.2                              | 4.42                                     |
| 99.8                              | 5.23                                     |
| 116                               | 5.97                                     |
| 133                               | 6.66                                     |

$$k_{\text{N}} = 0.0460 \pm 0.001 \text{ M}^{-1}\text{s}^{-1}$$



intercept = 0.0006 s<sup>-1</sup>                      corr. coeff. = 0.9993

Table S13. Summary of kinetic data for the reaction of 4-nitrophenyl 4-dimethylaminobenzoate(**1k**) with CN<sup>-</sup> in 80 mol % H<sub>2</sub>O / 20 mol % DMSO at 25.0 ± 0.1°C.

| [CN <sup>-</sup> ] / 10 <sup>-3</sup> M | <i>k</i> <sub>obsd</sub> / 10 <sup>-5</sup> s <sup>-1</sup> |
|-----------------------------------------|-------------------------------------------------------------|
| 54.0                                    | 6.49                                                        |
| 86.4                                    | 15.1                                                        |
| 108                                     | 20.7                                                        |
| 130                                     | 26.7                                                        |

$$k_N = (2.65 \pm 0.02) \times 10^{-3} \text{ M}^{-1} \text{ s}^{-1}$$

intercept = -0.00008 s<sup>-1</sup>                      corr. coeff. = 0.9999

Table S14. Summary of kinetic data for the reaction of 4-nitrophenyl 4-hydroxybenzoate(**1l**) with CN<sup>-</sup> in 80 mol % H<sub>2</sub>O / 20 mol % DMSO at 25.0 ± 0.1°C.

| [CN <sup>-</sup> ] / 10 <sup>-3</sup> M | <i>k</i> <sub>obsd</sub> / 10 <sup>-5</sup> s <sup>-1</sup> |
|-----------------------------------------|-------------------------------------------------------------|
| 108                                     | 3.26                                                        |
| 130                                     | 3.99                                                        |
| 162                                     | 5.20                                                        |
| 180                                     | 5.80                                                        |

$$k_N = (3.57 \pm 0.07) \times 10^{-4} \text{ M}^{-1} \text{ s}^{-1}$$

intercept = -0.000006 s<sup>-1</sup>                      corr. coeff. = 0.9997

Table S15. Summary of kinetic data for the reaction of 4-nitrophenyl 3,5-dinitrobenzoate(**1a**) with piperidine in 80 mol % H<sub>2</sub>O / 20 mol % DMSO at 25.0 ± 0.1°C.

| [piperidine] / 10 <sup>-3</sup> M | $k_{\text{obsd}} / 10^{-2} \text{s}^{-1}$ |
|-----------------------------------|-------------------------------------------|
| 0.845                             | 4.19                                      |
| 1.68                              | 8.08                                      |
| 2.51                              | 11.9                                      |
| 3.34                              | 16.0                                      |
| 4.16                              | 19.9                                      |

$$k_{\text{N}} = 47.5 \pm 0.3 \text{ M}^{-1} \text{ s}^{-1}$$

$$\text{intercept} = 0.001 \text{ s}^{-1}$$

$$\text{corr. coeff.} = 0.9999$$

Table S16. Summary of kinetic data for the reaction of 4-nitrophenyl 4-chloro-3-bromobenzoate(**1b**) with piperidine in 80 mol % H<sub>2</sub>O / 20 mol % DMSO at 25.0 ± 0.1°C.

| [piperidine] / 10 <sup>-3</sup> M | $k_{\text{obsd}} / 10^{-2} \text{s}^{-1}$ |
|-----------------------------------|-------------------------------------------|
| 0.845                             | 1.88                                      |
| 1.68                              | 3.79                                      |
| 2.51                              | 5.67                                      |
| 3.34                              | 7.58                                      |
| 4.16                              | 9.54                                      |

$$k_{\text{N}} = 23.1 \pm 0.1 \text{ M}^{-1} \text{ s}^{-1}$$

intercept =  $-0.0009 \text{ s}^{-1}$       corr. coeff. = 0.9999

Table S17. Summary of kinetic data for the reaction of 4-nitrophenyl 4-dimethylaminobenzoate(**1k**) with piperidine in 80 mol % H<sub>2</sub>O / 20 mol % DMSO at 25.0 ± 0.1°C.

| [piperidine] / 10 <sup>-3</sup> M | $k_{\text{obsd}} / 10^{-3} \text{ s}^{-1}$ |
|-----------------------------------|--------------------------------------------|
| 19.3                              | 5.12                                       |
| 35.3                              | 9.30                                       |
| 48.9                              | 12.6                                       |
| 60.6                              | 15.7                                       |
| 70.7                              | 18.5                                       |

$k_{\text{N}} = 0.259 \pm 0.003 \text{ M}^{-1} \text{ s}^{-1}$       intercept =  $0.0001 \text{ s}^{-1}$       corr. coeff. = 0.9995

Table S18. Summary of kinetic data for the reaction of 4-nitrophenyl 4-hydroxybenzoate(**1l**) with piperidine in 80 mol % H<sub>2</sub>O / 20 mol % DMSO at 25.0 ± 0.1°C.

| [piperidine] / 10 <sup>-3</sup> M | $k_{\text{obsd}} / 10^{-3} \text{ s}^{-1}$ |
|-----------------------------------|--------------------------------------------|
| 19.3                              | 1.37                                       |
| 35.3                              | 2.48                                       |
| 48.9                              | 3.33                                       |
| 60.6                              | 4.11                                       |
| 70.7                              | 4.77                                       |

$k_{\text{N}} = 0.0659 \pm 0.0006 \text{ M}^{-1} \text{ s}^{-1}$       intercept =  $0.0001 \text{ s}^{-1}$       corr. coeff. = 0.9999

Table S19. Summary of kinetic data for the reaction of 3,4-dinitrophenyl benzoate(**2a**) with CN<sup>-</sup> in 80 mol % H<sub>2</sub>O / 20 mol % DMSO at 25.0 ± 0.1 °C.

| [CN <sup>-</sup> ] / 10 <sup>-3</sup> M | <i>k</i> <sub>obsd</sub> / 10 <sup>-2</sup> s <sup>-1</sup> |
|-----------------------------------------|-------------------------------------------------------------|
| 8.68                                    | 1.71                                                        |
| 16.7                                    | 3.36                                                        |
| 24.2                                    | 4.81                                                        |
| 31.1                                    | 6.08                                                        |
| 37.6                                    | 7.28                                                        |

$$k_N = 1.92 \pm 0.02 \text{ M}^{-1}\text{s}^{-1}$$

$$\text{intercept} = 0.001 \text{ s}^{-1}$$

$$\text{corr. coeff.} = 0.9999$$

Table S20. Summary of kinetic data for the reaction of 4-nitrophenyl benzoate(**2b**) with CN<sup>-</sup> in 80 mol % H<sub>2</sub>O / 20 mol % DMSO at 25.0 ± 0.1 °C.

| [CN <sup>-</sup> ] / 10 <sup>-3</sup> M | <i>k</i> <sub>obsd</sub> / 10 <sup>-3</sup> s <sup>-1</sup> |
|-----------------------------------------|-------------------------------------------------------------|
| 18.2                                    | 1.92                                                        |
| 33.3                                    | 8.74                                                        |
| 46.1                                    | 11.3                                                        |
| 57.1                                    | 14.0                                                        |
| 66.6                                    | 16.2                                                        |

$$k_N = 0.231 \pm 0.001 \text{ M}^{-1}\text{s}^{-1}$$

$$\text{intercept} = 0.0008 \text{ s}^{-1}$$

$$\text{corr. coeff.} = 0.9991$$

Table S21. Summary of kinetic data for the reaction of 4-formylphenyl benzoate(**2d**) with CN<sup>-</sup> in 80 mol % H<sub>2</sub>O / 20 mol % DMSO at 25.0 ± 0.1 °C.

| [CN <sup>-</sup> ] / 10 <sup>-3</sup> M | <i>k</i> <sub>obsd</sub> / 10 <sup>-3</sup> s <sup>-1</sup> |
|-----------------------------------------|-------------------------------------------------------------|
| 18.2                                    | 2.17                                                        |
| 33.3                                    | 3.86                                                        |
| 46.1                                    | 5.20                                                        |
| 57.1                                    | 6.26                                                        |
| 66.7                                    | 7.18                                                        |

$$k_N = 0.103 \pm 0.002 \text{ M}^{-1}\text{s}^{-1}$$

$$\text{intercept} = 0.0004 \text{ s}^{-1}$$

$$\text{corr. coeff.} = 0.9997$$

Table S22. Summary of kinetic data for the reaction of 4-acetylphenyl benzoate(**2e**) with CN<sup>-</sup> in 80 mol % H<sub>2</sub>O / 20 mol % DMSO at 25.0 ± 0.1 °C.

| [CN <sup>-</sup> ] / 10 <sup>-3</sup> M | <i>k</i> <sub>obsd</sub> / 10 <sup>-3</sup> s <sup>-1</sup> |
|-----------------------------------------|-------------------------------------------------------------|
| 36.3                                    | 3.13                                                        |
| 49.9                                    | 4.19                                                        |
| 61.4                                    | 5.04                                                        |
| 71.3                                    | 5.83                                                        |

$$k_N = 0.0768 \pm 0.0007 \text{ M}^{-1}\text{s}^{-1}$$

$$\text{intercept} = 0.0003 \text{ s}^{-1}$$

$$\text{corr. coeff.} = 0.9999$$

Table S23. Summary of kinetic data for the reaction of 3-nitrophenyl benzoate(**2g**) with CN<sup>-</sup> in 80 mol % H<sub>2</sub>O / 20 mol % DMSO at 25.0 ± 0.1 °C.

| [CN <sup>-</sup> ] / 10 <sup>-3</sup> M | <i>k</i> <sub>obsd</sub> / 10 <sup>-3</sup> s <sup>-1</sup> |
|-----------------------------------------|-------------------------------------------------------------|
| 53.5                                    | 7.70                                                        |
| 68.1                                    | 9.73                                                        |
| 80.3                                    | 11.4                                                        |
| 90.5                                    | 12.9                                                        |
| 99.4                                    | 14.2                                                        |

$$k_N = 0.141 \pm 0.001 \text{ M}^{-1}\text{s}^{-1}$$

$$\text{intercept} = 0.0001 \text{ s}^{-1}$$

$$\text{corr. coeff.} = 0.9998$$

Table S24. Summary of kinetic data for the reaction of 3-acetylphenyl benzoate(**2h**) with CN<sup>-</sup> in 80 mol % H<sub>2</sub>O / 20 mol % DMSO at 25.0 ± 0.1 °C.

| [CN <sup>-</sup> ] / 10 <sup>-3</sup> M | <i>k</i> <sub>obsd</sub> / 10 <sup>-3</sup> s <sup>-1</sup> |
|-----------------------------------------|-------------------------------------------------------------|
| 53.0                                    | 1.90                                                        |
| 67.5                                    | 2.39                                                        |
| 79.5                                    | 2.81                                                        |
| 89.7                                    | 3.21                                                        |
| 98.4                                    | 3.52                                                        |

$$k_N = 0.0359 \pm 0.0006 \text{ M}^{-1}\text{s}^{-1}$$

$$\text{intercept} = -0.00002 \text{ s}^{-1}$$

$$\text{corr. coeff.} = 0.9996$$

Table S25. Summary of kinetic data for the reaction of phenyl benzoate(**2j**) with CN<sup>-</sup> in 80 mol % H<sub>2</sub>O / 20 mol % DMSO at 25.0 ± 0.1°C.

| [CN <sup>-</sup> ] / 10 <sup>-3</sup> M | <i>k</i> <sub>obsd</sub> / 10 <sup>-3</sup> s <sup>-1</sup> |
|-----------------------------------------|-------------------------------------------------------------|
| 52.0                                    | 5.31                                                        |
| 66.2                                    | 6.63                                                        |
| 78.0                                    | 7.94                                                        |
| 88.0                                    | 8.92                                                        |
| 96.6                                    | 9.81                                                        |

$$k_N = 0.0102 \pm 0.0002 \text{ M}^{-1}\text{s}^{-1}$$

$$\text{intercept} = -0.000002 \text{ s}^{-1} \quad \text{corr. coeff.} = 0.9996$$

Table S26. Summary of kinetic data for the reaction of 4-methylphenyl benzoate(**2k**) CN<sup>-</sup> in 80 mol % H<sub>2</sub>O / 20 mol % DMSO at 25.0 ± 0.1°C.

| [CN <sup>-</sup> ] / 10 <sup>-3</sup> M | <i>k</i> <sub>obsd</sub> / 10 <sup>-4</sup> s <sup>-1</sup> |
|-----------------------------------------|-------------------------------------------------------------|
| 52.0                                    | 4.19                                                        |
| 66.2                                    | 5.35                                                        |
| 78.0                                    | 6.24                                                        |
| 88.0                                    | 7.02                                                        |
| 96.6                                    | 7.70                                                        |

$$k_N = (7.83 \pm 0.06) \times 10^{-3} \text{ M}^{-1}\text{s}^{-1}$$

$$\text{intercept} = 0.00001 \text{ s}^{-1} \quad \text{corr. coeff.} = 0.9999$$

Table S27. Summary of kinetic data for the reaction of 4-methoxyphenyl benzoate(**21**) with CN<sup>-</sup> in 80 mol % H<sub>2</sub>O / 20 mol % DMSO at 25.0 ± 0.1 °C.

| [CN <sup>-</sup> ] / 10 <sup>-3</sup> M | <i>k</i> <sub>obsd</sub> / 10 <sup>-4</sup> s <sup>-1</sup> |
|-----------------------------------------|-------------------------------------------------------------|
| 52.0                                    | 4.35                                                        |
| 66.2                                    | 5.46                                                        |
| 78.0                                    | 6.54                                                        |
| 88.0                                    | 7.33                                                        |
| 96.6                                    | 8.10                                                        |

$$k_N = (8.43 \pm 0.01) \times 10^{-3} \text{ M}^{-1}\text{s}^{-1}$$

$$\text{intercept} = -0.000006 \text{ s}^{-1}$$

$$\text{corr. coeff.} = 0.9996$$

Table S28. Summary of kinetic data for the reaction of 3,4-dinitrophenyl benzoate(**2a**) with hydrazine in 80 mol % H<sub>2</sub>O / 20 mol % DMSO at 25.0 ± 0.1 °C.

| [hydrazine] / 10 <sup>-3</sup> M | <i>k</i> <sub>obsd</sub> / 10 <sup>-1</sup> s <sup>-1</sup> |
|----------------------------------|-------------------------------------------------------------|
| 4.90                             | 1.53                                                        |
| 9.80                             | 3.11                                                        |
| 14.7                             | 4.77                                                        |
| 19.6                             | 6.44                                                        |
| 24.5                             | 7.97                                                        |

$$k_N = 33.1 \pm 0.2 \text{ M}^{-1}\text{s}^{-1}$$

$$\text{intercept} = -0.009 \text{ s}^{-1}$$

$$\text{corr. coeff.} = 0.9999$$



Table S29. Summary of kinetic data for the reaction of 3,4-dinitrophenyl benzoate(**2a**) with glycyglycine in 80 mol % H<sub>2</sub>O / 20 mol % DMSO at 25.0 ± 0.1°C.

| [glycyglycine] / 10 <sup>-3</sup> M | <i>k</i> <sub>obsd</sub> / 10 <sup>-3</sup> s <sup>-1</sup> |
|-------------------------------------|-------------------------------------------------------------|
| 3.77                                | 5.82                                                        |
| 7.26                                | 11.0                                                        |
| 10.5                                | 15.7                                                        |
| 13.5                                | 20.1                                                        |
| 16.3                                | 24.5                                                        |

$k_N = 1.48 \pm 0.01 \text{ M}^{-1}\text{s}^{-1}$

intercept = 0.00002 s<sup>-1</sup>      corr. coeff. = 0.9999
